# Supplementary material
Source: MDPI journal article supplement (https://www.mdpi.com/1999-4907/11/9/983)
Supplement: s1 [file s1]

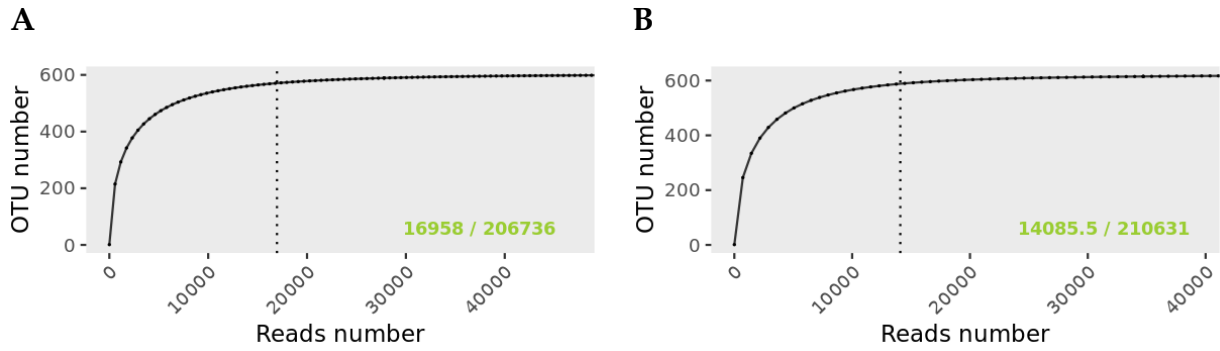

**Figure S1.** Rarefaction curves for 16S rRNA gene sequences from soils sampled in the burned (A) and control (B) plots. The vertical dotted line indicates the required read number to observe 95% of the overall richness for the given condition. The read number to achieve this 95% of richness is indicated in green, at the bottom-right part of the plot before the slash sign; the total number of reads summing all samples for the given condition is shown in green after the slash. Green text means that the number of reads needed to achieve 95% of richness is lower than the total number of reads summing all samples.
