# Supplementary material
Source: MDPI journal article supplement (https://www.mdpi.com/1999-4907/11/9/983)
Supplement: s1 [file s1]

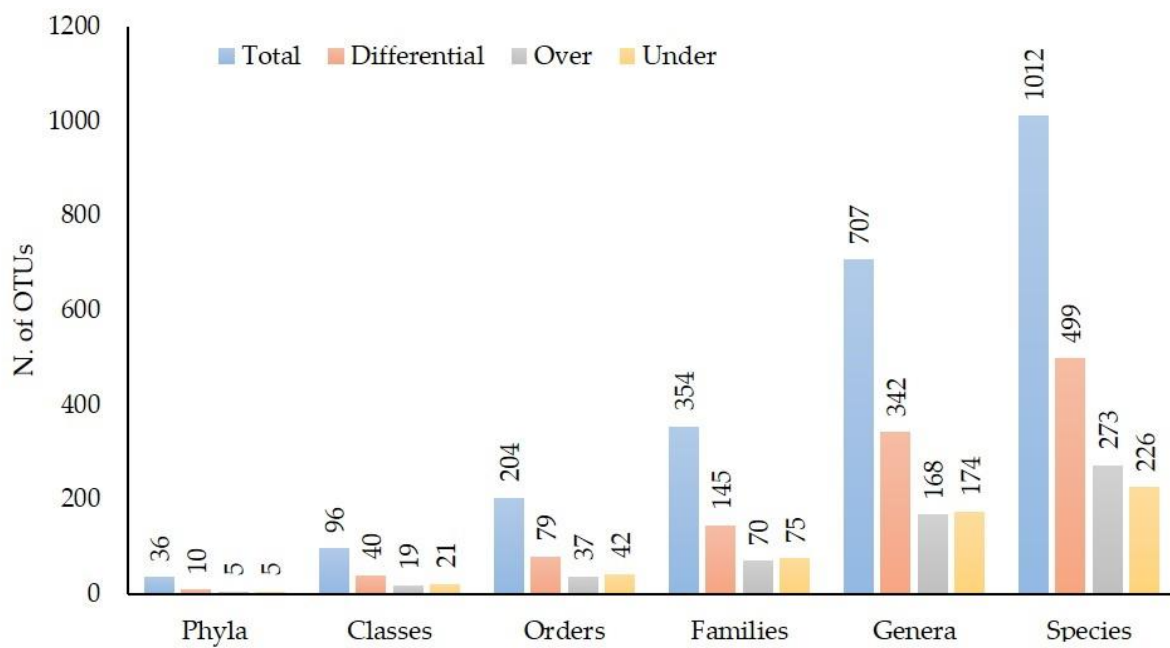

**Figure S2.** Total number of OTUs in the output results (Total), the total number of differentially represented OTUs (Differential) and the number of over- and under-represented OTUs in burned vs. control plots.
